# Supplementary material
Source: HighWire-hosted journal article supplement (doi:10.1101/rna.079776.123)
Supplement: Supplementary_Table_S1.xlsx [file Supplementary_Table_S1.xlsx]

## Sheet: Supplementary Table S1
Description of oligo	Purification	Sequence
Common self-complimentary hairpin oligo (5'Bio-ssHP)	Standard Desalting	5'-CAC GGT CCG CTG AAC TTA CAG CGG ACC GTG-3'
RNA oligos used for preparing Thin Layer Chromatography (TLC) standards for T4 PNK labeling with ATP γ-32P
pA	RNase-Free HPLC	5'-rArArA rArArA rArArA rArArA rArA-3'
pm6A		/5Mod//iN6Me-rA/rArA rArArA rArArA rArA-3'
pAm		5'-mArArA rArArA rArArA rArArA rArArA rA-3'
pm6Am		5'-pppm6AmrGrC rArCrU rUrGrC rUrUrU rUrGrA rCrArC rArArC rU-3'
pC		5'-rCrCrC rArArC rUrUrA rA-3'
pG		5'-rGrGrG rArGrA rArCrU rG-3'
pU		5'-rUrUrU rArCrA rArCrU rU-3'
RNA oligos used for spike-in experiments
A-RNA42	RNase-Free HPLC	5’-rArArG rGrCrA rCrGrA rUrGrG rArCrU rArCrC rArCrU rArCrG rCrGrU rUrCrU rUrGrU rCrArG rArCrC rGrCrA-3’
m6A-RNA42		5’-rArArG rGrCrA rCrGrA rUrGrG /iN6Me-rA/rCrU rArCrC rArCrU rArCrG rCrGrU rUrCrU rUrGrU rCrArG rArCrC rGrCrA-3'
Oligonucleotide sequences for SCARPET assays
Gene	Site	SCARPET oligo	Purification	5'-Biotinylated self-complimentary hairpin splint oligo (5'-Bio-ssHP)	Purification	Remarks
18S rRNA	A1832	A1832.chi: 5’-mAmAmC mCmUmU mGmUT ACG mAmCmU mUmUmU mAmC-3’	Standard Desalting	5'Bio-ssHP.A1832: 5'-/5Biosg/TT CCG CAG GTT CAC CTA CGG AAA CCT TGT CAC GGT CCG CTG AAC TTA CAG CGG ACC GTG-3'	PAGE
				5'Bio-ssHP1.A1832: 5'-/5Biosg/TT CCG CAG GTT CAC CTA CGG AAA CCT TGT CGC GAG TCC GCT GAA CTT ACA GCG GAC TCG CG-3'		T:A base-pair at -2 position moved to -5 position and replace with C:G base pair at -2 position in the 5'Bio-ssHP common hairpin
				5'Bio-ssHP2.A1832: 5'-/5Biosg/TT CCG CAG GTT CAC CTA CGG AAA CCT TGA CAC GGT CCG CTG AAC TTA CAG CGG ACC GTG-3'		Three mismatches in the splint region near the ligation junction 5’-->3’ [TGT-->ACA] (“5Bio-ssHP2”).
				5'Bio-ssHP3.A1832: 5'-/5Biosg/CA GGT TCA CCT ACG GAA ACC TAC ACA CGG TCC GCT GAA CTT ACA GCG GAC CGT G-3'		Splint in 5'Bio-ssHP.A1832 shortened by 5 nt
				5'Bio-ssHP4.A1832: 5'-/5Biosg/TA CGG AAA CCT ACA CAC GGT CCG CTG AAC TTA CAG CGG ACC GTG-3'		Splint in 5'Bio-ssHP.A1832 shortened by 15 nt
	A536	A536.chi: 5’-mCmGmA mAmAmG mAmGmU CCT GmUmA mUmUmG mUmUmA-3’		5'Bio-ssHP.A536: 5'-/5Biosg/TCA TTC CAA TTA CAG GGC CTC GAA AGA GTC ACG GTC CGC TGA ACT TAC AGC GGA CCG TG-3’
	A1719	A1719.chi: 5'-mAmUmC mCmAmA mUCG GTmA mGmUmA mGmCmG-3'		5'Bio-ssHP.A1719: 5'-/5Biosg/AT CCG AGG GCC TCA CTA AAC CAT CCA ATC ACG GTC CGC TGA ACT TAC AGC GGA CCG TG-3'
A-RNA42 / m6A RNA42	A13	A13.chi: 5’-mGmUmG mGmUmA mGmUC CAT mCmGmU mGmCmC mUmU-3’		5'Bio-ssHP.A13: 5'-/5Biosg/GCG GTC TGA CAA GAA CGC GTA GTG GTA GTC ACG GTC CGC TGA ACT TAC AGC GGA CCG TG-3’
ACTB	A1216	A1216.chi: 5’-mGmUmC mAmUmA mGmUC CGC mCmUmA mGmUmU mGmC-3’		5'Bio-ssHP.A1216: 5'-/5Biosg/GA AAG GGT GTA ACG CAA CTA AGT CAT AGT CAC GGT CCG CTG AAC TTA CAG CGG ACC GTG-3'
MALAT1	A2577	A2577.chi: 5′-mCmUmC mAmAmA mGmUC CAA mUmGmC mAmAmA mAmA-3′		5'Bio-ssHP.A2577: 5'-/5Biosg/CT AGT CCT CAG GAT TTA AAA AAT AAT CTT AAC TCA AAG TCA CGG TCC GCT GAA CTT ACA GCG GAC CGT G-3'
TUBB4B	A568	A568.chi: 5'-mAmAmAmC mGmUmG mUTC ATmG mAmUmC mCmUmGmU-3'		5'Bio-ssHP.A568: 5'-/5Biosg/TT TGG GCG AAG GCA CCA CAC TAA ACG TGT CAC GGT CCG CTG AAC TTA CAG CGG ACC GTG-3'
TUBA1B	A1273	A1273.chi: 5'-mCmAmA mAmCmU mUmGmU GGT CmCmA mGmGmC mGmAmG mC-3'		5'Bio-ssHP.A1273: 5'-/5Biosg/AC GCT TGG CAT ACA TCA GGT CAA ACT TGT CAC GGT CCG CTG AAC TTA CAG CGG ACC GTG-3'
RACK1	A1004	A1004.chi: 5'-mGmAmGmA mCmAmG mUCA CCmG mUmGmU mUmCmAmG-3'		5'Bio-ssHP.A1004: 5'-/5Biosg/GC ACA GAG GGA TCC ATC TGG AGA GAC AGT CAC GGT CCG CTG AAC TTA CAG CGG ACC GTG-3'
ACTG1	A1343	A1343.chi: 5'-mUmGmCmU mGmAmG mUCC GTmU mUmAmG mAmAmGmC-3'		5'Bio-ssHP.A1343: 5'-/5Biosg/AT GCA GCA AAT GCT ACG CAT CTG CTG AGT CAC GGT CCG CTG AAC TTA CAG CGG ACC GTG-3'
YTHDF2	A2022	A2022.chi: 5'-mCmUmG mAmAmG mUCA GTmG mAmAmA mUmUmA-3'		5'Bio-ssHP.A2022: 5'-/5Biosg/AA CTG CAA GTC TGC AAT CGT CTC TGA AGT CAC GGT CCG CTG AAC TTA CAG CGG ACC GTG-3'
MYC	A1361	A1361.chi: 5'-mAmGmG mAmUmA mGmUC CTT mCmCmG mAmGmU mGmG-3’		5'Bio-ssHP.A1361: 5'-/5Biosg/CAA CTT GAC CCT CTT GGC AGC AGG ATA GTC ACG GTC CGC TGA ACT TAC AGC GGA CCG TG-3’
	A1716	A1716.chi: 5'-mCmAmA mGmAmG mUTC CGmU mAmGmC mUmGmU-3'		5'Bio-ssHP.A1716: 5'-/5Biosg/TTT CCT TAC TTT TCC TTA CGC ACA AGA GTC ACG GTC CGC TGA ACT TAC AGC GGA CCG TG-3’
Escherichia phage ϕX174 genome (NC_001422.1)	A580	A580.chi: 5'-mCmCmA mCmAmA mAmGmU CCA GmCmG mUmAmC mCmAmU mA-3’		5'Bio-ssHP.A580: 5'-/5Biosg/AGC AGG AAA GCG AGG GTA TCC CAC AAA GTC ACG GTC CGC TGA ACT TAC AGC GGA CCG TG-3’
	A2768	A2768.chi: 5’-mUmCmA mCmAmC mAmGmU CCT TmGmA mCmGmG mUmAmU mA-3’		5'bio-ssHP.A2768: 5'-/5Biosg/ACG GGG AAG GAC GTC AAT AGT CAC ACA GTC ACG GTC CGC TGA ACT TAC AGC GGA CCG TG-3’
	A3242	A3242.chi: 5’-mCmCmA mCmCmA mAmGmU CCA AmCmC mAmAmA mUmCmA mA-3’		5'bio-ssHP.A3242: 5'-/5Biosg/CTT TAT CAG CGG CAG ACT TGC CAC CAA GTC ACG GTC CGC TGA ACT TAC AGC GGA CCG TG-3’
Zika virus (MR766) complete genome (NC_012532.1)	A4824	A4824.chi: 5'-mCmAmC mCmAmA mGmUC CTG mCmUmU mGmAmC mAmU-3’		5'Bio-ssHP.A4824: 5'-/5Biosg/CTT CCA AGG CCC ACA GTA TGA CAC CAA GTC ACG GTC CGC TGA ACT TAC AGC GGA CCG TG-3’
	A5811	A5811.chi: 5’-mGmAmC mAmAmA mGmUC CCA mCmUmC mUmUmG mAmU-3’		5'Bio-ssHP.A5811: 5'-/5Biosg/CTC TGA GAT GTC AGT TGT TAT GAC AAA GTC ACG GTC CGC TGA ACT TAC AGC GGA CCG TG-3’
	A9199	A9199.chi: 5’-mAmUmC mCmUmU mGmUC TTT mGmCmA mAmUmC mCmU-3’		5'Bio-ssHP.A9199: 5'-/5Biosg/GAT TCA TTT CTT CTA GAA TGT ATC CAA GTC ACG GTC CGC TGA ACT TAC AGC GGA CCG TG-3’
